# Supplementary material
Source: PubMed Central journal article supplement (PMC5399116)
Supplement: 10.1074_M116.762542_jbc.M116.762542-1.pdf [file 10.1074_M116.762542_jbc.M116.762542-1.pdf]

Supplemental Materials

Stilbene epoxidation and detoxification in a *Photorhabdus luminescens*-nematode symbiosis

**Hyun Bong Park,<sup>1,2</sup> Parthasarathy Sampathkumar,<sup>3,\$</sup> Corey E. Perez,<sup>1,2</sup> Joon Ha Lee,<sup>4</sup> Jeannie Tran,<sup>2</sup> Jeffrey B. Bonanno,<sup>3</sup> Elissa A. Hallem,<sup>4</sup> Steven C. Almo,<sup>3</sup> and Jason M. Crawford<sup>\*,1,2,5</sup>**

From the <sup>1</sup>Department of Chemistry, Yale University, New Haven, Connecticut 06520, United States, <sup>2</sup>Chemical Biology Institute, Yale University, West Haven, Connecticut 06516, United States, <sup>3</sup>Department of Biochemistry, Albert Einstein College of Medicine, Bronx, New York 10461, United States, <sup>4</sup>Department of Microbiology, Immunology, and Molecular Genetics, University of California, Los Angeles, California 90095, United States and <sup>5</sup>Department of Microbial Pathogenesis, Yale School of Medicine, New Haven, Connecticut 06510, United States

<sup>\$</sup>Present address: New York Structural Biology Center, New York, NY 10027.

Running title: *Bacterial Stilbene Epoxidation*

\*To whom correspondence should be addressed: Prof. Jason M. Crawford, Department of Chemistry, Yale University, New Haven, Connecticut 06520, Telephone: + 1 203 737 3966; Fax: +1 203 737 3289; E-mail: jason.crawford@yale.edu

Table S1. The major conformers of possible diastereomers A and B of compound **3**<sup>a</sup>

| Conformers        | Boltzmann population (%) | Relative energy (KJ/mol) |
|-------------------|--------------------------|--------------------------|
| Diastereomer A_1  | 16.99561                 | 0                        |
| Diastereomer A_2  | 16.796544                | 0.029                    |
| Diastereomer A_3  | 13.969961                | 0.486                    |
| Diastereomer A_4  | 13.012172                | 0.662                    |
| Diastereomer A_5  | 11.626486                | 0.941                    |
| Diastereomer A_6  | 6.890221                 | 2.238                    |
| Diastereomer A_7  | 6.311961                 | 2.455                    |
| Diastereomer A_8  | 4.674104                 | 3.2                      |
| Diastereomer A_9  | 2.702416                 | 4.558                    |
| Diastereomer A_10 | 2.654765                 | 4.602                    |
| Diastereomer A_11 | 1.251053                 | 6.467                    |
| Diastereomer A_12 | 1.13498                  | 6.709                    |
| Diastereomer A_13 | 0.818636                 | 7.518                    |
| Diastereomer A_14 | 0.586516                 | 8.345                    |
| Diastereomer A_15 | 0.574573                 | 8.396                    |
| Diastereomer B_1  | 15.456274                | 0                        |
| Diastereomer B_2  | 14.353578                | 0.183                    |
| Diastereomer B_3  | 11.025971                | 0.837                    |
| Diastereomer B_4  | 7.629023                 | 1.75                     |
| Diastereomer B_5  | 7.555183                 | 1.774                    |
| Diastereomer B_6  | 6.295617                 | 2.226                    |
| Diastereomer B_7  | 6.206271                 | 2.262                    |
| Diastereomer B_8  | 4.415255                 | 3.106                    |
| Diastereomer B_9  | 3.46024                  | 3.71                     |
| Diastereomer B_10 | 3.279239                 | 3.843                    |
| Diastereomer B_11 | 3.103805                 | 3.979                    |
| Diastereomer B_12 | 2.995462                 | 4.068                    |
| Diastereomer B_13 | 2.755307                 | 4.275                    |
| Diastereomer B_14 | 1.921398                 | 5.168                    |
| Diastereomer B_15 | 1.830332                 | 5.289                    |
| Diastereomer B_16 | 1.514783                 | 5.758                    |
| Diastereomer B_17 | 1.217719                 | 6.299                    |
| Diastereomer B_18 | 1.202138                 | 6.331                    |
| Diastereomer B_19 | 1.199418                 | 6.336                    |
| Diastereomer B_20 | 1.016044                 | 6.748                    |
| Diastereomer B_21 | 0.788752                 | 7.375                    |
| Diastereomer B_22 | 0.778191                 | 7.409                    |

<sup>a</sup>Conformers of possible diastereomers A and B (see Figure 6A in the main text) were elucidated by conformational searches in MMFF94 force field and the searches were achieved in the gas phase with a 50 kJ/mol energy limit.

Table S2. The major conformers of possible diastereomers A and B of compound **4**<sup>a</sup>

| Conformers        | Boltzmann population (%) | Relative energy (KJ/mol) |
|-------------------|--------------------------|--------------------------|
| Diastereomer A_1  | 23.929334                | 0                        |
| Diastereomer A_2  | 23.663033                | 0.028                    |
| Diastereomer A_3  | 9.7899                   | 2.215                    |
| Diastereomer A_4  | 7.908566                 | 2.744                    |
| Diastereomer A_5  | 7.779933                 | 2.785                    |
| Diastereomer A_6  | 7.646424                 | 2.828                    |
| Diastereomer A_7  | 4.329456                 | 4.238                    |
| Diastereomer A_8  | 3.649751                 | 4.661                    |
| Diastereomer A_9  | 2.976641                 | 5.167                    |
| Diastereomer A_10 | 1.910525                 | 6.266                    |
| Diastereomer A_11 | 1.873444                 | 6.314                    |
| Diastereomer A_12 | 1.341412                 | 7.142                    |
| Diastereomer A_13 | 1.11643                  | 7.598                    |
| Diastereomer A_14 | 1.10387                  | 7.626                    |
| Diastereomer A_15 | 0.539609                 | 9.4                      |
| Diastereomer A_16 | 0.441671                 | 9.896                    |
| Diastereomer B_1  | 23.708086                | 0                        |
| Diastereomer B_2  | 23.048167                | 0.07                     |
| Diastereomer B_3  | 16.429826                | 0.909                    |
| Diastereomer B_4  | 12.912744                | 1.506                    |
| Diastereomer B_5  | 7.976771                 | 2.7                      |
| Diastereomer B_6  | 3.860104                 | 4.499                    |
| Diastereomer B_7  | 3.809869                 | 4.532                    |
| Diastereomer B_8  | 0.875772                 | 8.176                    |
| Diastereomer B_9  | 0.798784                 | 8.404                    |
| Diastereomer B_10 | 0.697631                 | 8.74                     |
| Diastereomer B_11 | 0.668061                 | 8.847                    |
| Diastereomer B_12 | 0.64039                  | 8.952                    |
| Diastereomer B_13 | 0.623508                 | 9.018                    |
| Diastereomer B_14 | 0.561137                 | 9.28                     |
| Diastereomer B_15 | 0.555323                 | 9.306                    |
| Diastereomer B_16 | 0.531562                 | 9.414                    |
| Diastereomer B_17 | 0.501356                 | 9.559                    |
| Diastereomer B_18 | 0.469721                 | 9.721                    |
| Diastereomer B_19 | 0.455625                 | 9.796                    |
| Diastereomer B_20 | 0.442937                 | 9.866                    |
| Diastereomer B_21 | 0.432627                 | 9.924                    |

<sup>a</sup>Conformers of possible diastereomers A and B (see Figure 6A in the main text) were elucidated by conformational searches in MMFF94 force field and the searches were achieved in the gas phase with a 50 kJ/mol energy limit.

Table S3. Calculated thermodynamic data and ZPVE (zero-point vibrational energy) of conformers of possible diastereomers A and B of compound **3** at the B3LYP/6-31G(d,p) level in the gas phase.

| Conformers        | Zero-Point Energy (ZPE) | Thermal Energies (U) | Thermal Enthalpies (H) | Thermal Free Energies (G) |
|-------------------|-------------------------|----------------------|------------------------|---------------------------|
| Diastereomer A_1  | -1285.106176            | -1285.079023         | -1285.078079           | -1285.165206              |
| Diastereomer A_2  | -1285.106163            | -1285.079016         | -1285.078072           | -1285.165155              |
| Diastereomer A_3  | -1285.105388            | -1285.078283         | -1285.077339           | -1285.164452              |
| Diastereomer A_4  | -1285.104834            | -1285.077491         | -1285.076546           | -1285.164277              |
| Diastereomer A_5  | -1285.105388            | -1285.078283         | -1285.077339           | -1285.164452              |
| Diastereomer A_6  | -1285.107               | -1285.080145         | -1285.079201           | -1285.165421              |
| Diastereomer A_7  | -1285.106466            | -1285.07936          | -1285.078416           | -1285.165383              |
| Diastereomer A_8  | -1285.107               | -1285.080145         | -1285.079201           | -1285.165421              |
| Diastereomer A_9  | -1285.107353            | -1285.080415         | -1285.079471           | -1285.165956              |
| Diastereomer A_10 | -1285.107347            | -1285.080407         | -1285.079462           | -1285.165926              |
| Diastereomer A_11 | -1285.10433             | -1285.07734          | -1285.076396           | -1285.163169              |
| Diastereomer A_12 | -1285.103804            | -1285.076563         | -1285.075619           | -1285.163183              |
| Diastereomer A_13 | -1285.10433             | -1285.07734          | -1285.076396           | -1285.163169              |
| Diastereomer A_14 | -1285.104939            | -1285.077872         | -1285.076927           | -1285.163916              |
| Diastereomer A_15 | -1285.104924            | -1285.077859         | -1285.076915           | -1285.163919              |
| Diastereomer B_1  | -1285.105831            | -1285.078842         | -1285.077898           | -1285.164893              |
| Diastereomer B_2  | -1285.105219            | -1285.077974         | -1285.07703            | -1285.164831              |
| Diastereomer B_3  | -1285.105831            | -1285.078842         | -1285.077898           | -1285.164893              |
| Diastereomer B_4  | -1285.104493            | -1285.077241         | -1285.076297           | -1285.163918              |
| Diastereomer B_5  | -1285.1045              | -1285.077231         | -1285.076286           | -1285.16409               |
| Diastereomer B_6  | -1285.106275            | -1285.07923          | -1285.078286           | -1285.16546               |
| Diastereomer B_7  | -1285.106176            | -1285.079135         | -1285.078191           | -1285.165336              |
| Diastereomer B_8  | -1285.103125            | -1285.075823         | -1285.074878           | -1285.163119              |
| Diastereomer B_9  | -1285.103772            | -1285.076574         | -1285.075629           | -1285.16326               |
| Diastereomer B_10 | -1285.103236            | -1285.075784         | -1285.07484            | -1285.163296              |
| Diastereomer B_11 | -1285.103772            | -1285.076574         | -1285.075629           | -1285.16326               |
| Diastereomer B_12 | -1285.103772            | -1285.076574         | -1285.075629           | -1285.16326               |
| Diastereomer B_13 | -1285.103236            | -1285.075784         | -1285.07484            | -1285.163296              |
| Diastereomer B_14 | -1285.103367            | -1285.07637          | -1285.075426           | -1285.163239              |
| Diastereomer B_15 | -1285.102829            | -1285.075593         | -1285.074649           | -1285.16296               |
| Diastereomer B_16 | -1285.103367            | -1285.07637          | -1285.075426           | -1285.163239              |
| Diastereomer B_17 | -1285.104493            | -1285.077241         | -1285.076297           | -1285.163918              |
| Diastereomer B_18 | -1285.102202            | -1285.074961         | -1285.074017           | -1285.16215               |
| Diastereomer B_19 | -1285.1045              | -1285.077231         | -1285.076286           | -1285.16409               |
| Diastereomer B_20 | -1285.101698            | -1285.07418          | -1285.073236           | -1285.162346              |
| Diastereomer B_21 | -1285.103749            | -1285.076692         | -1285.075748           | -1285.163708              |
| Diastereomer B_22 | -1285.103748            | -1285.076691         | -1285.075747           | -1285.1636                |

Table S4. Calculated thermodynamic data and ZPVE (zero-point vibrational energy) of conformers of possible diastereomers of compound **4** at the B3LYP/6-31G(d,p) level in the gas phase.

| Conformers        | Zero-Point Energy (ZPE) | Thermal Energies (U) | Thermal Enthalpies (H) | Thermal Free Energies (G) |
|-------------------|-------------------------|----------------------|------------------------|---------------------------|
| Diastereomer A_1  | -1285.106353            | -1285.079225         | -1285.078281           | -1285.165231              |
| Diastereomer A_2  | -1285.106452            | -1285.079319         | -1285.078375           | -1285.16537               |
| Diastereomer A_3  | -1285.105057            | -1285.07799          | -1285.077045           | -1285.163918              |
| Diastereomer A_4  | -1285.10446             | -1285.077165         | -1285.07622            | -1285.163737              |
| Diastereomer A_5  | -1285.107496            | -1285.08056          | -1285.079615           | -1285.166026              |
| Diastereomer A_6  | -1285.107512            | -1285.080572         | -1285.079628           | -1285.166117              |
| Diastereomer A_7  | -1285.105057            | -1285.07799          | -1285.077046           | -1285.163918              |
| Diastereomer A_8  | -1285.106399            | -1285.079523         | -1285.078579           | -1285.16488               |
| Diastereomer A_9  | -1285.105867            | -1285.078745         | -1285.077801           | -1285.164878              |
| Diastereomer A_10 | -1285.10473             | -1285.07738          | -1285.076436           | -1285.164091              |
| Diastereomer A_11 | -1285.106399            | -1285.079523         | -1285.078579           | -1285.16488               |
| Diastereomer A_12 | -1285.105167            | -1285.078051         | -1285.077107           | -1285.164073              |
| Diastereomer A_13 | -1285.104895            | -1285.077806         | -1285.076862           | -1285.16401               |
| Diastereomer A_14 | -1285.10489             | -1285.077809         | -1285.076865           | -1285.163929              |
| Diastereomer A_15 | -1285.103821            | -1285.076784         | -1285.07584            | -1285.162919              |
| Diastereomer A_16 | -1285.10331             | -1285.076024         | -1285.07508            | -1285.162944              |
| Diastereomer B_1  | -1285.106937            | -1285.07994          | -1285.078995           | -1285.165922              |
| Diastereomer B_2  | -1285.106931            | -1285.079943         | -1285.078999           | -1285.165863              |
| Diastereomer B_3  | -1285.106256            | -1285.079299         | -1285.078355           | -1285.165266              |
| Diastereomer B_4  | -1285.105724            | -1285.078541         | -1285.077596           | -1285.165144              |
| Diastereomer B_5  | -1285.106256            | -1285.079299         | -1285.078355           | -1285.165266              |
| Diastereomer B_6  | -1285.104365            | -1285.077072         | -1285.076128           | -1285.164302              |
| Diastereomer B_7  | -1285.104417            | -1285.077129         | -1285.076184           | -1285.164228              |
| Diastereomer B_8  | -1285.104417            | -1285.077129         | -1285.076184           | -1285.164228              |
| Diastereomer B_9  | -1285.102898            | -1285.075663         | -1285.074719           | -1285.162703              |
| Diastereomer B_10 | -1285.104106            | -1285.077031         | -1285.076087           | -1285.164046              |
| Diastereomer B_11 | -1285.10403             | -1285.076974         | -1285.076029           | -1285.163823              |
| Diastereomer B_12 | -1285.10229             | -1285.074821         | -1285.073877           | -1285.162503              |
| Diastereomer B_13 | -1285.103485            | -1285.076467         | -1285.075523           | -1285.163256              |
| Diastereomer B_14 | -1285.10333             | -1285.07608          | -1285.075136           | -1285.162904              |
| Diastereomer B_15 | -1285.103485            | -1285.076467         | -1285.075523           | -1285.163256              |
| Diastereomer B_16 | -1285.103005            | -1285.075755         | -1285.074811           | -1285.163259              |
| Diastereomer B_17 | -1285.103005            | -1285.075755         | -1285.074811           | -1285.16326               |
| Diastereomer B_18 | -1285.102766            | -1285.075294         | -1285.07435            | -1285.162691              |
| Diastereomer B_19 | -1285.102898            | -1285.075663         | -1285.074719           | -1285.162703              |
| Diastereomer B_20 | -1285.101769            | -1285.074475         | -1285.073531           | -1285.162196              |
| Diastereomer B_21 | -1285.102898            | -1285.075663         | -1285.074719           | -1285.162703              |

Table S5. The Boltzmann populations of the conformers of possible diastereomers A and B of compound **3** at the B3LYP/6-31G(d,p) level in the gas phase

| Conformers        | Zero-Point Energy (ZPE) | Thermal Energies (U) | Thermal Enthalpies (H) | Thermal Free Energies (G) |
|-------------------|-------------------------|----------------------|------------------------|---------------------------|
| Diastereomer A_1  | 5.8%                    | 4.8%                 | 4.8%                   | 9.1%                      |
| Diastereomer A_2  | 5.7%                    | 4.7%                 | 4.7%                   | 10.5%                     |
| Diastereomer A_3  | 2.5%                    | 2.2%                 | 2.2%                   | 2.2%                      |
| Diastereomer A_4  | 1.4%                    | 0.9%                 | 0.9%                   | 1.8%                      |
| Diastereomer A_5  | 2.5%                    | 2.2%                 | 2.2%                   | 21.2%                     |
| Diastereomer A_6  | 14.1%                   | 15.8%                | 15.8%                  | 23.4%                     |
| Diastereomer A_7  | 7.9%                    | 6.8%                 | 6.8%                   | 2.2%                      |
| Diastereomer A_8  | 14.1%                   | 15.8%                | 15.8%                  | 6.2%                      |
| Diastereomer A_9  | 20.5%                   | 21.1%                | 21.1%                  | 6.2%                      |
| Diastereomer A_10 | 20.4%                   | 21.0%                | 20.9%                  | 2.7%                      |
| Diastereomer A_11 | 0.8%                    | 0.8%                 | 0.8%                   | 6.2%                      |
| Diastereomer A_12 | 0.5%                    | 0.3%                 | 0.3%                   | 2.6%                      |
| Diastereomer A_13 | 0.8%                    | 0.8%                 | 0.8%                   | 2.5%                      |
| Diastereomer A_14 | 1.5%                    | 1.4%                 | 1.4%                   | 2.3%                      |
| Diastereomer A_15 | 1.5%                    | 1.4%                 | 1.4%                   | 0.8%                      |
| Diastereomer B_1  | 13.4%                   | 14.8%                | 14.8%                  | 9.9%                      |
| Diastereomer B_2  | 6.9%                    | 5.8%                 | 5.8%                   | 9.3%                      |
| Diastereomer B_3  | 13.4%                   | 14.8%                | 14.8%                  | 9.9%                      |
| Diastereomer B_4  | 3.2%                    | 2.7%                 | 2.7%                   | 3.5%                      |
| Diastereomer B_5  | 3.2%                    | 2.6%                 | 2.6%                   | 4.2%                      |
| Diastereomer B_6  | 21.5%                   | 22.4%                | 22.4%                  | 18.2%                     |
| Diastereomer B_7  | 19.4%                   | 20.2%                | 20.2%                  | 15.9%                     |
| Diastereomer B_8  | 0.7%                    | 0.6%                 | 0.6%                   | 1.5%                      |
| Diastereomer B_9  | 1.5%                    | 1.3%                 | 1.3%                   | 1.7%                      |
| Diastereomer B_10 | 0.8%                    | 0.6%                 | 0.6%                   | 1.8%                      |
| Diastereomer B_11 | 1.5%                    | 1.3%                 | 1.3%                   | 1.7%                      |
| Diastereomer B_12 | 1.5%                    | 1.3%                 | 1.3%                   | 1.7%                      |
| Diastereomer B_13 | 0.8%                    | 0.6%                 | 0.6%                   | 1.8%                      |
| Diastereomer B_14 | 1.0%                    | 1.0%                 | 1.0%                   | 1.7%                      |
| Diastereomer B_15 | 0.5%                    | 0.5%                 | 0.5%                   | 1.3%                      |
| Diastereomer B_16 | 1.0%                    | 1.0%                 | 1.0%                   | 1.7%                      |
| Diastereomer B_17 | 3.2%                    | 2.7%                 | 2.7%                   | 3.5%                      |
| Diastereomer B_18 | 0.3%                    | 0.2%                 | 0.2%                   | 0.5%                      |
| Diastereomer B_19 | 3.2%                    | 2.6%                 | 2.6%                   | 4.2%                      |
| Diastereomer B_20 | 0.2%                    | 0.1%                 | 0.1%                   | 0.6%                      |
| Diastereomer B_21 | 1.4%                    | 1.5%                 | 1.5%                   | 2.8%                      |
| Diastereomer B_22 | 1.4%                    | 1.5%                 | 1.5%                   | 2.5%                      |

Table S6. The Boltzmann populations of the conformers of possible diastereomers A and B of compound **4** at the B3LYP/6-31G(d,p) level in the gas phase

| Conformers        | Zero-Point Energy (ZPE) | Thermal Energies (U) | Thermal Enthalpies (H) | Thermal Free Energies (G) |
|-------------------|-------------------------|----------------------|------------------------|---------------------------|
| Diastereomer A_1  | 7.5%                    | 6.5%                 | 6.5%                   | 9.0%                      |
| Diastereomer A_2  | 8.4%                    | 7.1%                 | 7.2%                   | 10.4%                     |
| Diastereomer A_3  | 1.9%                    | 1.7%                 | 1.7%                   | 2.2%                      |
| Diastereomer A_4  | 1.0%                    | 0.7%                 | 0.7%                   | 1.8%                      |
| Diastereomer A_5  | 25.6%                   | 27.0%                | 27.0%                  | 21.1%                     |
| Diastereomer A_6  | 26.0%                   | 27.3%                | 27.3%                  | 23.2%                     |
| Diastereomer A_7  | 1.9%                    | 1.7%                 | 1.7%                   | 2.2%                      |
| Diastereomer A_8  | 7.9%                    | 8.9%                 | 8.9%                   | 6.2%                      |
| Diastereomer A_9  | 4.5%                    | 3.9%                 | 3.9%                   | 6.2%                      |
| Diastereomer A_10 | 1.3%                    | 0.9%                 | 0.9%                   | 2.7%                      |
| Diastereomer A_11 | 7.9%                    | 8.9%                 | 8.9%                   | 6.2%                      |
| Diastereomer A_12 | 2.1%                    | 1.8%                 | 1.8%                   | 2.6%                      |
| Diastereomer A_13 | 1.6%                    | 1.4%                 | 1.4%                   | 2.4%                      |
| Diastereomer A_14 | 1.6%                    | 1.4%                 | 1.4%                   | 2.2%                      |
| Diastereomer A_15 | 0.5%                    | 0.5%                 | 0.5%                   | 0.8%                      |
| Diastereomer A_16 | 0.3%                    | 0.2%                 | 0.2%                   | 0.8%                      |
| Diastereomer B_1  | 27.1%                   | 27.8%                | 27.8%                  | 22.0%                     |
| Diastereomer B_2  | 27.0%                   | 27.9%                | 27.9%                  | 20.6%                     |
| Diastereomer B_3  | 13.1%                   | 14.0%                | 14.0%                  | 10.9%                     |
| Diastereomer B_4  | 7.4%                    | 6.2%                 | 6.2%                   | 9.6%                      |
| Diastereomer B_5  | 13.1%                   | 14.0%                | 14.0%                  | 10.9%                     |
| Diastereomer B_6  | 1.7%                    | 1.3%                 | 1.3%                   | 3.9%                      |
| Diastereomer B_7  | 1.8%                    | 1.4%                 | 1.4%                   | 3.6%                      |
| Diastereomer B_8  | 1.8%                    | 1.4%                 | 1.4%                   | 3.6%                      |
| Diastereomer B_9  | 0.4%                    | 0.3%                 | 0.3%                   | 0.7%                      |
| Diastereomer B_10 | 1.3%                    | 1.2%                 | 1.2%                   | 3.0%                      |
| Diastereomer B_11 | 1.2%                    | 1.2%                 | 1.2%                   | 2.3%                      |
| Diastereomer B_12 | 0.2%                    | 0.1%                 | 0.1%                   | 0.6%                      |
| Diastereomer B_13 | 0.7%                    | 0.7%                 | 0.7%                   | 1.3%                      |
| Diastereomer B_14 | 0.6%                    | 0.4%                 | 0.4%                   | 0.9%                      |
| Diastereomer B_15 | 0.7%                    | 0.7%                 | 0.7%                   | 1.3%                      |
| Diastereomer B_16 | 0.4%                    | 0.3%                 | 0.3%                   | 1.3%                      |
| Diastereomer B_17 | 0.4%                    | 0.3%                 | 0.3%                   | 1.3%                      |
| Diastereomer B_18 | 0.3%                    | 0.2%                 | 0.2%                   | 0.7%                      |
| Diastereomer B_19 | 0.4%                    | 0.3%                 | 0.3%                   | 0.7%                      |
| Diastereomer B_20 | 0.1%                    | 0.1%                 | 0.1%                   | 0.4%                      |
| Diastereomer B_21 | 0.4%                    | 0.3%                 | 0.3%                   | 0.7%                      |

Table S7. Experimental (Exp.) and calculated (Cal.) NMR chemical shift values of compounds **3** and **4** with diastereomers A and B<sup>a</sup>

| Compound <b>3</b> |        |        |        | Compound <b>4</b> |        |        |        |
|-------------------|--------|--------|--------|-------------------|--------|--------|--------|
| Position          | Exp.   | Cal. A | Cal. B | Position          | Exp.   | Cal.A  | Cal.B  |
| C1                | 157.55 | 148.81 | 149.06 | C1                | 157.57 | 149.53 | 148.29 |
| C2                | 106.6  | 103.69 | 104.52 | C2                | 110.83 | 107.12 | 107.87 |
| C3                | 142.16 | 137.08 | 136.78 | C3                | 133.86 | 135.89 | 134.16 |
| C4                | 106.6  | 104.51 | 103.64 | C4                | 110.83 | 106.66 | 108.71 |
| C5                | 157.55 | 148.93 | 148.78 | C5                | 157.57 | 148.41 | 148.85 |
| C6                | 120.08 | 111.45 | 111.53 | C6                | 121.45 | 113.04 | 113.04 |
| C7                | 74.71  | 76.22  | 76.25  | C7                | 73.82  | 75.71  | 80.37  |
| C8                | 75.47  | 76.05  | 78.78  | C8                | 74.35  | 76.47  | 76.8   |
| C9                | 138.75 | 135.42 | 134.55 | C9                | 143.39 | 136.06 | 135.67 |
| C10               | 131.22 | 125.19 | 125.41 | C10               | 127.5  | 122.45 | 121.5  |
| C11               | 127.52 | 122.27 | 122.05 | C11               | 128.2  | 122.37 | 122.01 |
| C12               | 127.33 | 121.55 | 121.68 | C12               | 127.4  | 120.8  | 121.14 |
| C13               | 127.52 | 122.34 | 122.2  | C13               | 128.2  | 121.97 | 122.6  |
| C14               | 131.22 | 125    | 125.9  | C14               | 127.5  | 121.68 | 122.62 |
| C15               | 25.25  | 28.48  | 28.52  | C15               | 25.33  | 28.55  | 28.54  |
| C16               | 21.63  | 21.32  | 21.57  | C16               | 21.59  | 21.18  | 21.28  |
| C17               | 21.63  | 21.52  | 21.35  | C17               | 21.59  | 21.28  | 21.24  |
| C1'               | 178.67 | 169.22 | 169.23 | C1'               | 175.93 | 169.55 | 170.24 |
| C2'               | 65.3   | 63.62  | 63.49  | C2'               | 65.59  | 63.63  | 64.45  |
| C3'               | 30.87  | 29.49  | 29.98  | C3'               | 29.98  | 29.48  | 29.72  |
| C4'               | 24.15  | 24.97  | 26.16  | C4'               | 23.9   | 25.05  | 27.5   |
| C5'               | 52.71  | 49.07  | 51.44  | C5'               | 52.44  | 49.01  | 52.54  |
| H2                | 6.93   | 5.99   | 5.92   | H2                | 7.12   | 5.85   | 6.2    |
| H4                | 6.93   | 5.97   | 6.08   | H4                | 7.12   | 6.2    | 5.77   |
| H7                | 5.62   | 5.26   | 5.46   | H7                | 4.52   | 4.01   | 3.2    |
| H8                | 4.26   | 4.13   | 3.71   | H8                | 5.77   | 5.37   | 5.5    |
| H10               | 7.59   | 7.22   | 7.65   | H10               | 7.55   | 7.38   | 7.24   |
| H11               | 7.21   | 7.15   | 7.23   | H11               | 7.2    | 7.17   | 7.24   |
| H12               | 7.16   | 7.18   | 7.16   | H12               | 7.11   | 7.1    | 7.12   |
| H13               | 7.21   | 7.22   | 7.09   | H13               | 7.2    | 7.22   | 7.18   |
| H14               | 7.59   | 7.51   | 7      | H14               | 7.55   | 7.28   | 7.4    |
| H15               | 4.23   | 3.15   | 3.14   | H15               | 4.25   | 3.3    | 3.24   |
| H16               | 1.74   | 0.97   | 1.01   | H16               | 1.75   | 0.96   | 0.97   |
| H16               | 1.74   | 1.11   | 0.9    | H16               | 1.75   | 1.16   | 1.35   |
| H16               | 1.74   | 1.63   | 1.7    | H16               | 1.75   | 1.57   | 1.32   |
| H17               | 1.73   | 0.96   | 0.99   | H17               | 1.74   | 0.97   | 0.96   |
| H17               | 1.73   | 1.53   | 1.76   | H17               | 1.74   | 1.61   | 1.81   |
| H17               | 1.73   | 1.1    | 0.97   | H17               | 1.74   | 1.09   | 0.92   |
| H2'               | 3.92   | 3.61   | 3.66   | H2'               | 4.29   | 3.7    | 3.44   |
| H3'               | 2.2    | 2.18   | 2.05   | H3'               | 2.23   | 2.17   | 1.93   |
| H3'               | 2.06   | 1.97   | 1.98   | H3'               | 2.11   | 2.01   | 1.87   |
| H4'               | 1.5    | 1.91   | 1.79   | H4'               | 1.55   | 1.91   | 1.79   |
| H4'               | 1.72   | 1.95   | 2.06   | H4'               | 1.74   | 1.95   | 2.15   |
| H5'               | 2.59   | 2.91   | 2.57   | H5'               | 3.01   | 2.92   | 2.47   |
| H5'               | 3.19   | 3.3    | 3.13   | H5'               | 3.52   | 3.29   | 3.43   |



Table S8. Minimum inhibitory concentrations (MIC) of the stilbene metabolites **1-4**.

| Stilbene metabolites                | Minimum Inhibitory Concentration (MIC) (µg/ml) |                                       |                                 |
|-------------------------------------|------------------------------------------------|---------------------------------------|---------------------------------|
|                                     | <i>Bacillus subtilis</i><br>NCIB3610           | <i>Escherichia coli</i><br>Nissle1917 | <i>Saccharomyces cerevisiae</i> |
| Prolbene A ( <b>3</b> )             | >200                                           | >200                                  | >200                            |
| Prolbene B ( <b>4</b> )             | >200                                           | >200                                  | >200                            |
| <i>trans</i> -Stilbene ( <b>1</b> ) | 3.125                                          | 12.5                                  | 12.5                            |
| Stilbene epoxide ( <b>2</b> )       | 12.5                                           | 25                                    | 50                              |



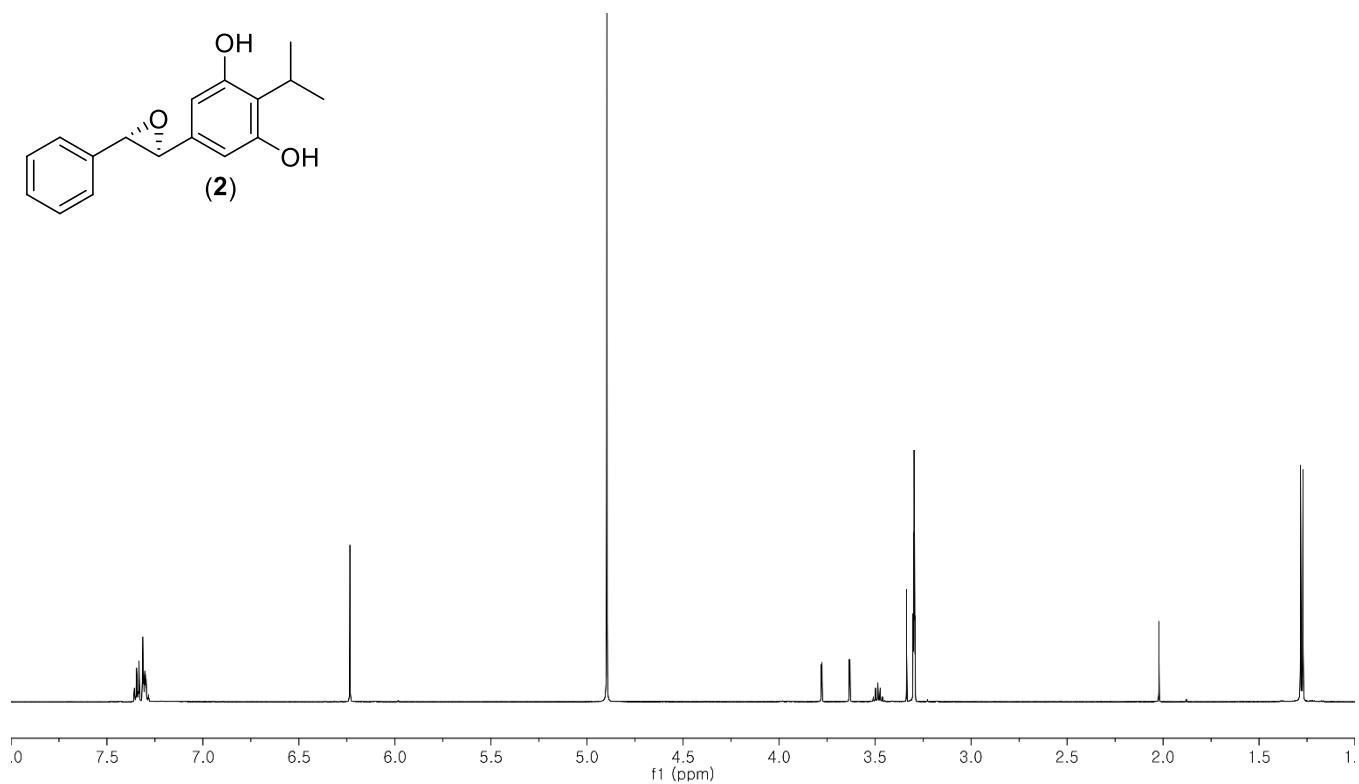

Figure S2. <sup>1</sup>H NMR spectrum of 2-isopropyl-5-(3-phenyl-oxiranyl)-benzene-1,3-diol (**2**)

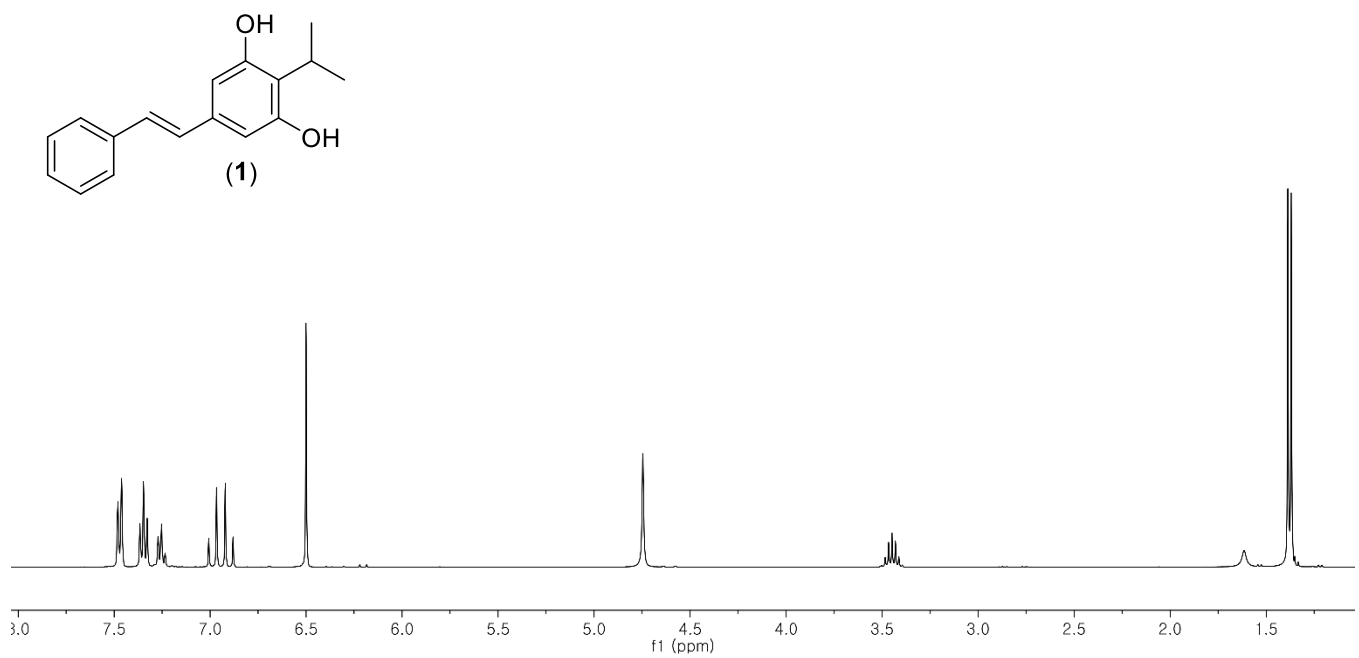

Figure S3. <sup>1</sup>H NMR spectrum of 3,5-dihydroxy-4-isopropyl-*trans*-stilbene (**1**)

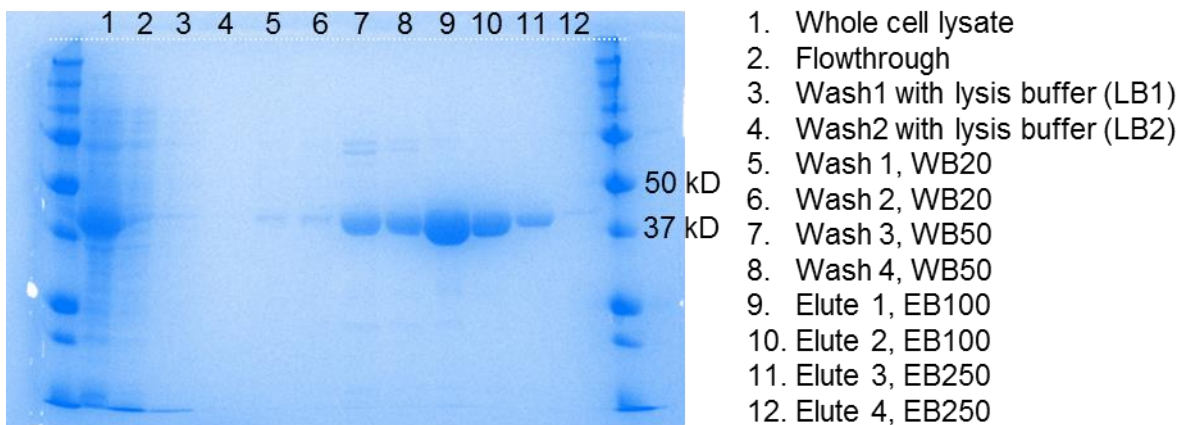

Figure S4. SDS-PAGE gel of fractions from the purification of 6xHis-Plu2236

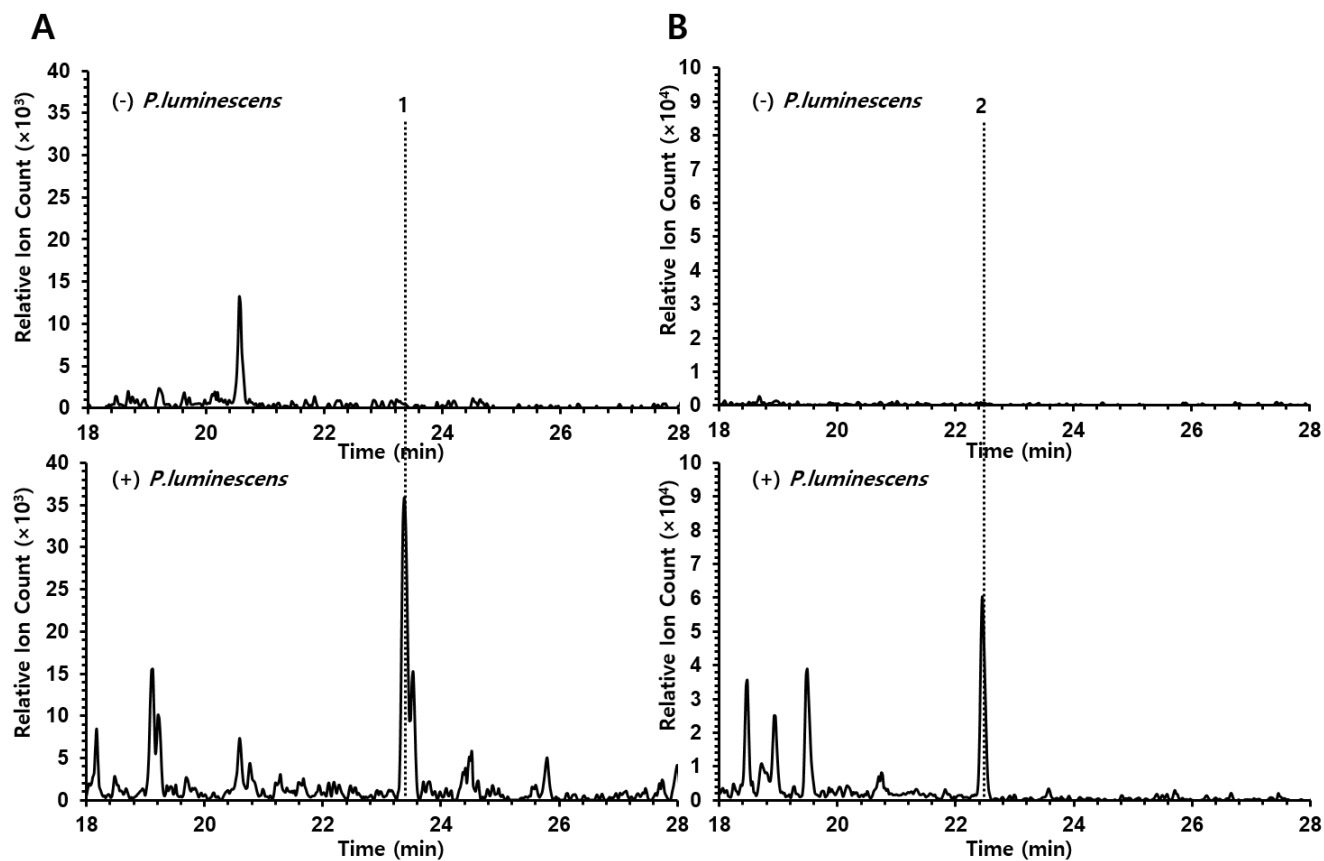

Figure S5. Extracted ion chromatograms for the production of stilbene **1** (A) and stilbene epoxide **2** (B) in *G. mellonella* larvae with (+) and without (-) *P. luminescens* TT01

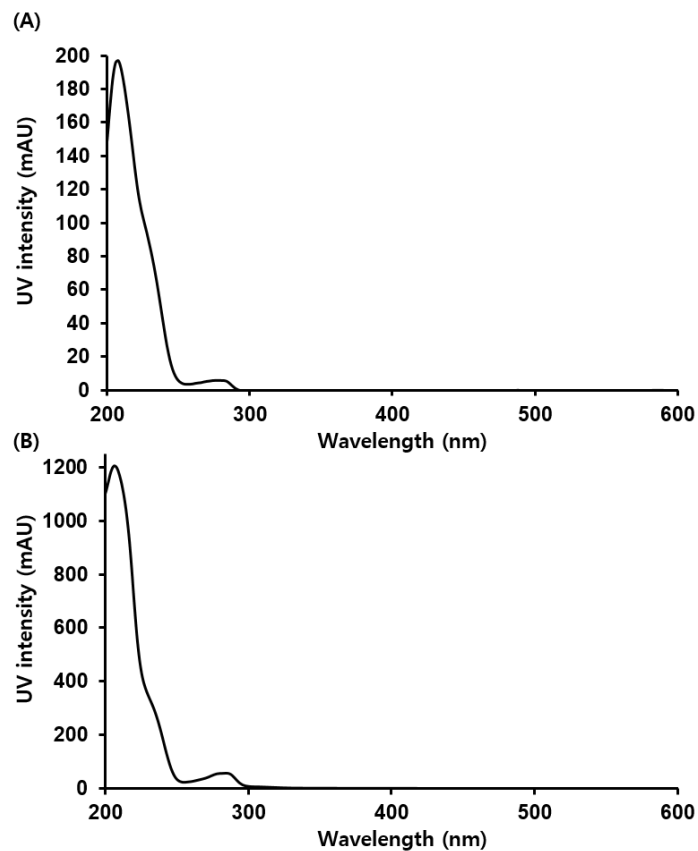

Figure S6. UV spectra of compounds **3** (A) and **4** (B)

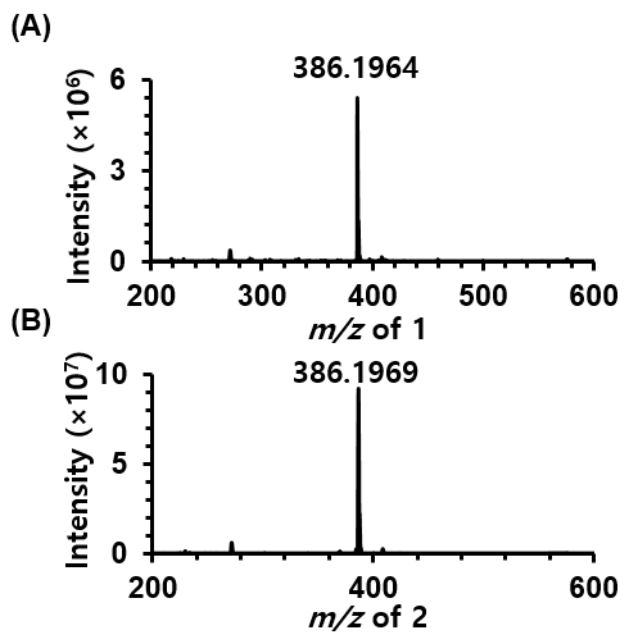

Figure S7. HRESIQTOFMS spectra of compounds **3** (A) and **4** (B)

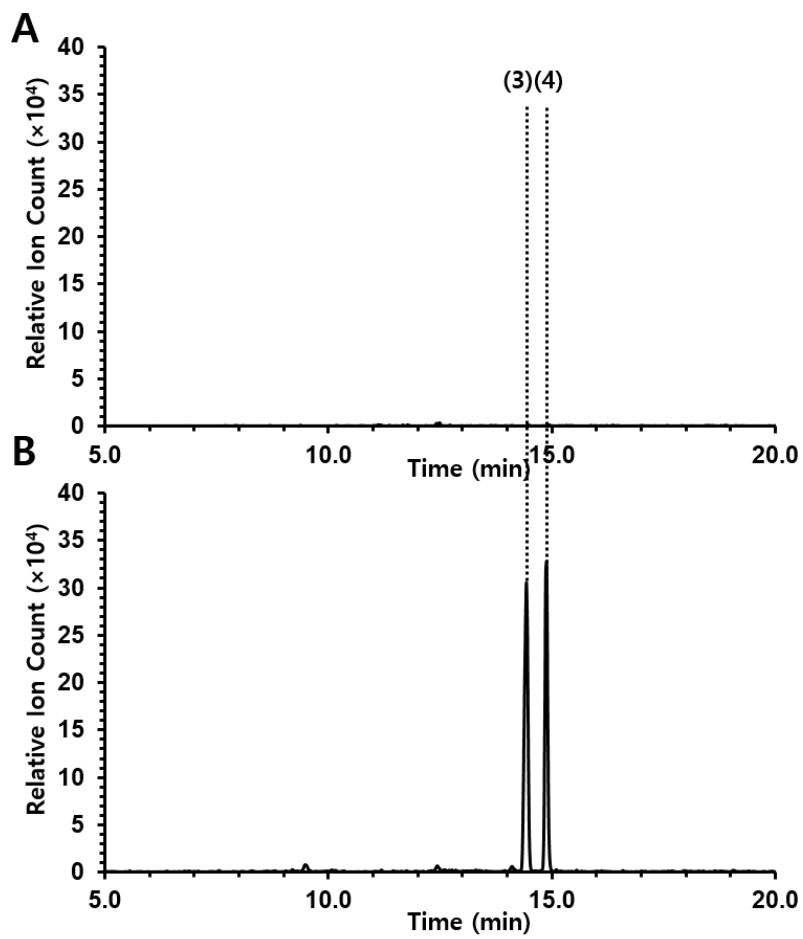

Figure S8. Extracted ion chromatograms for the detection of compounds **3** (A) and **4** (B) in hemolymph-mimetic medium

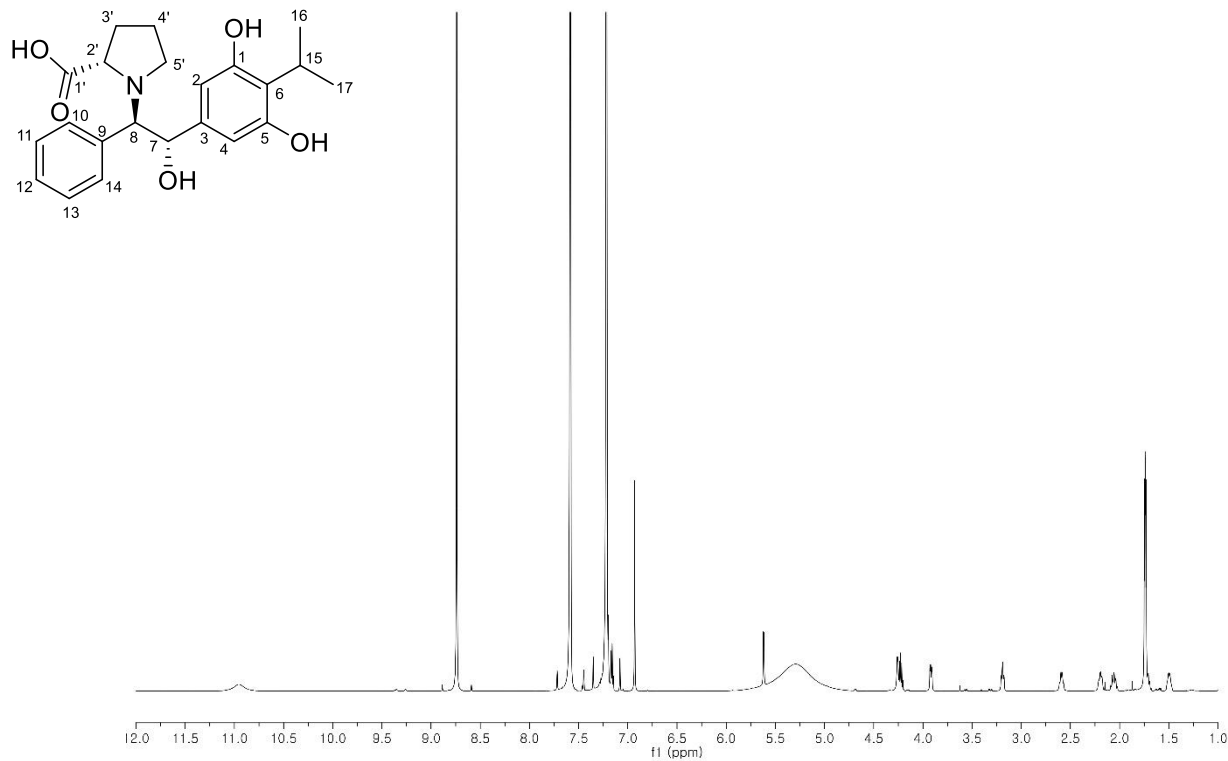

Figure S9.  $^1\text{H}$  NMR spectrum of compound **3**

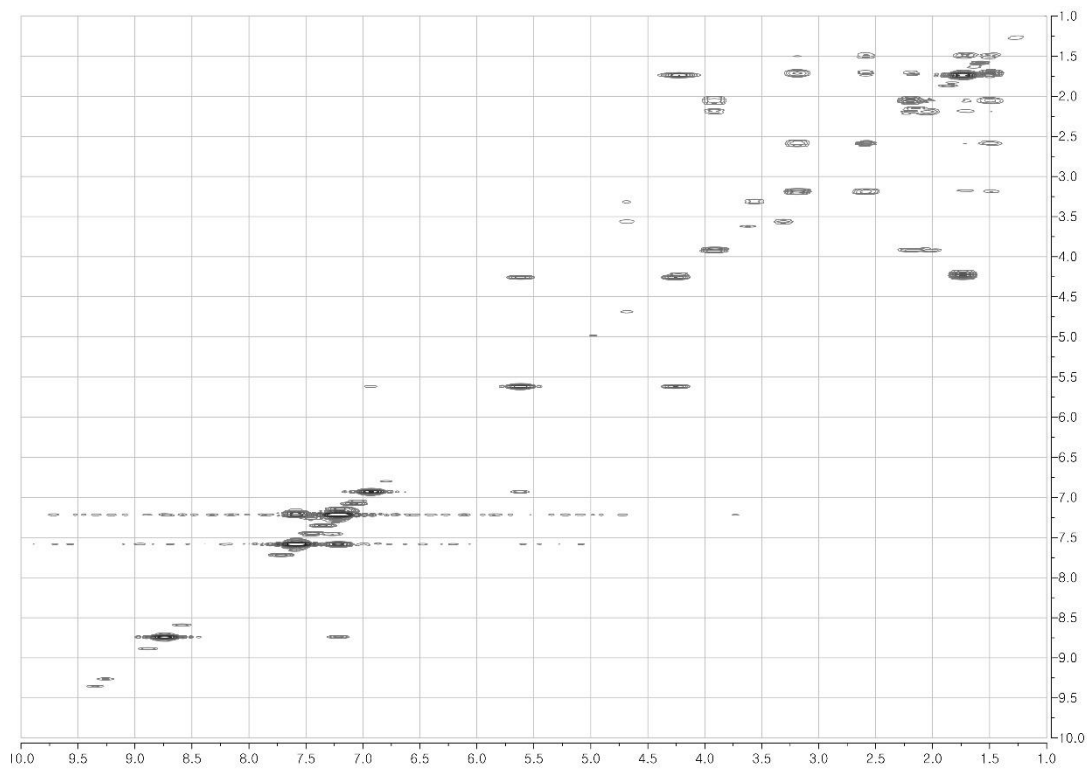

Figure S10. COSY NMR spectrum of compound **3**  
S16



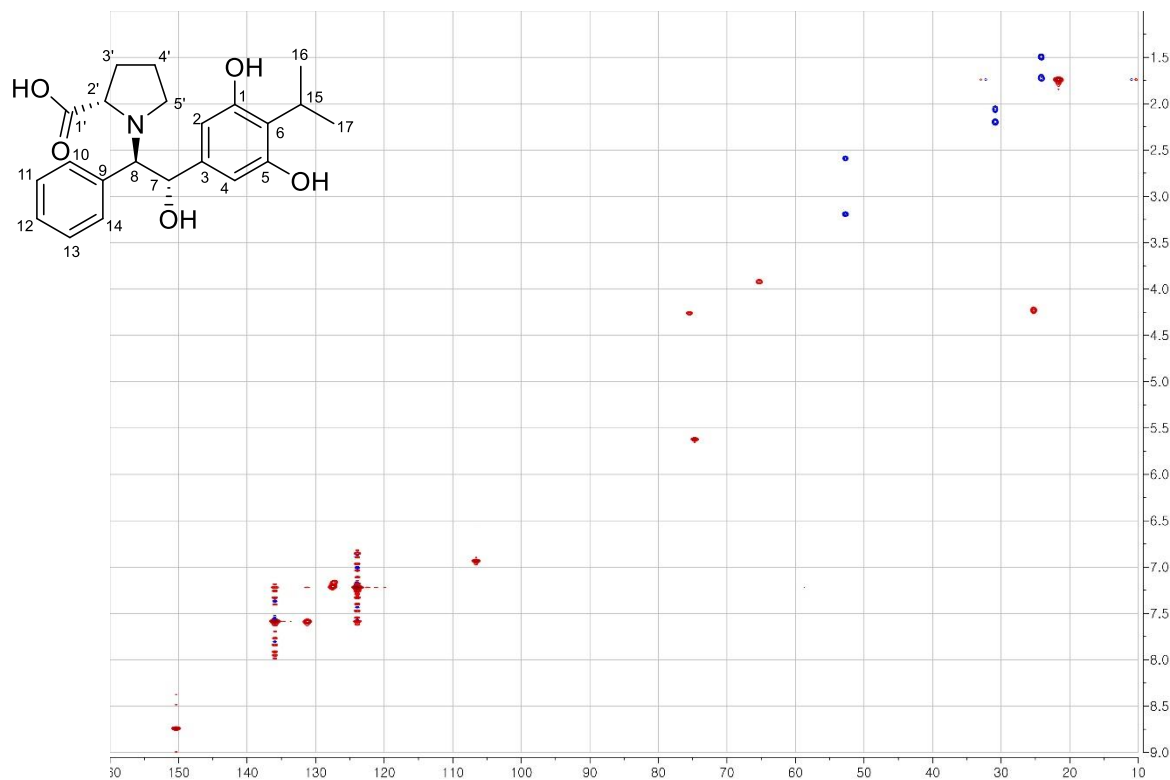

Figure S11. HSQC NMR spectrum of compound **3**

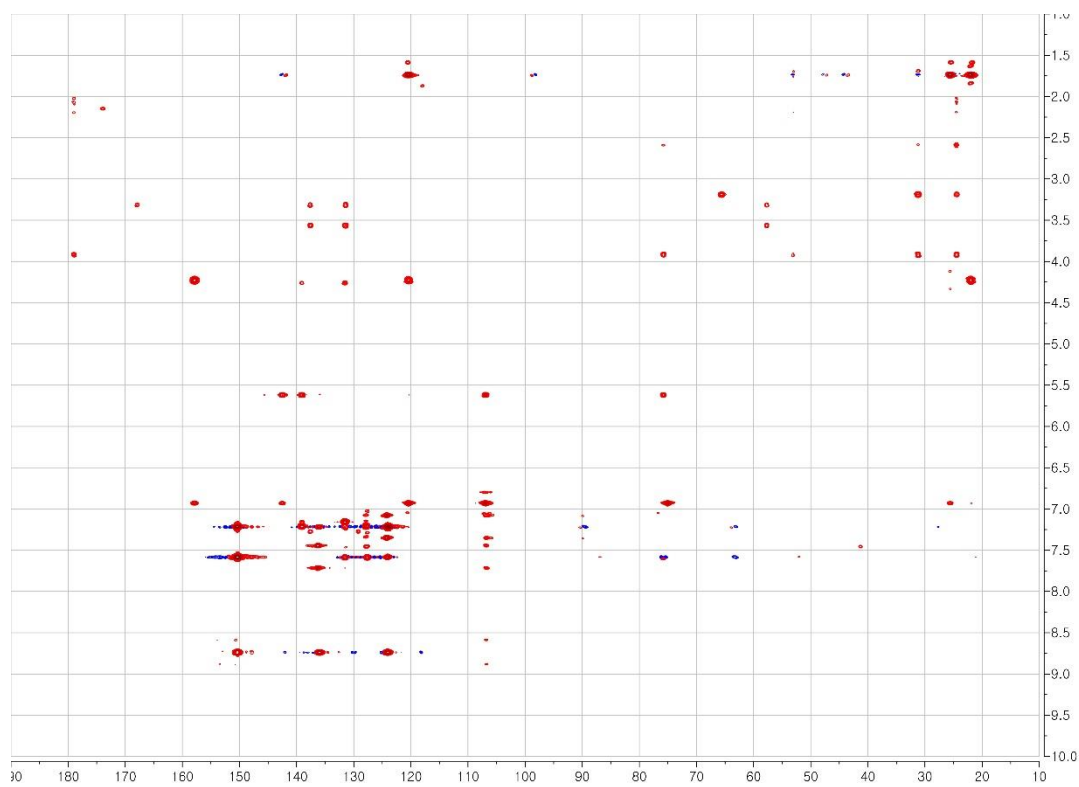

Figure S12. HMBC NMR spectrum of compound **3**

S17

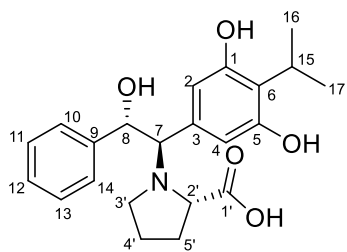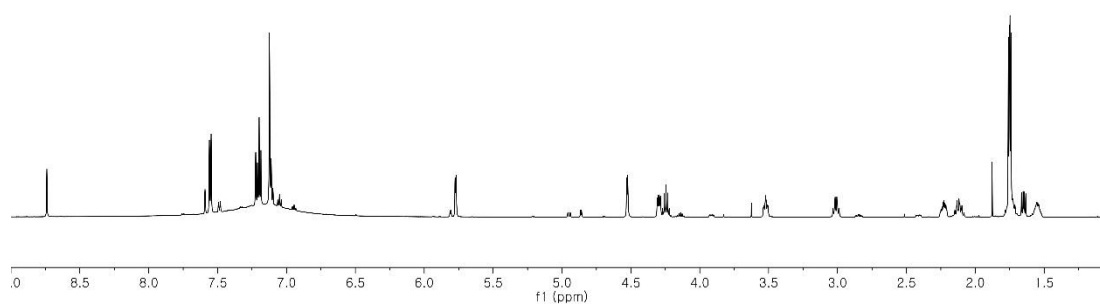

Figure S13. <sup>1</sup>H NMR spectrum of compound **4**

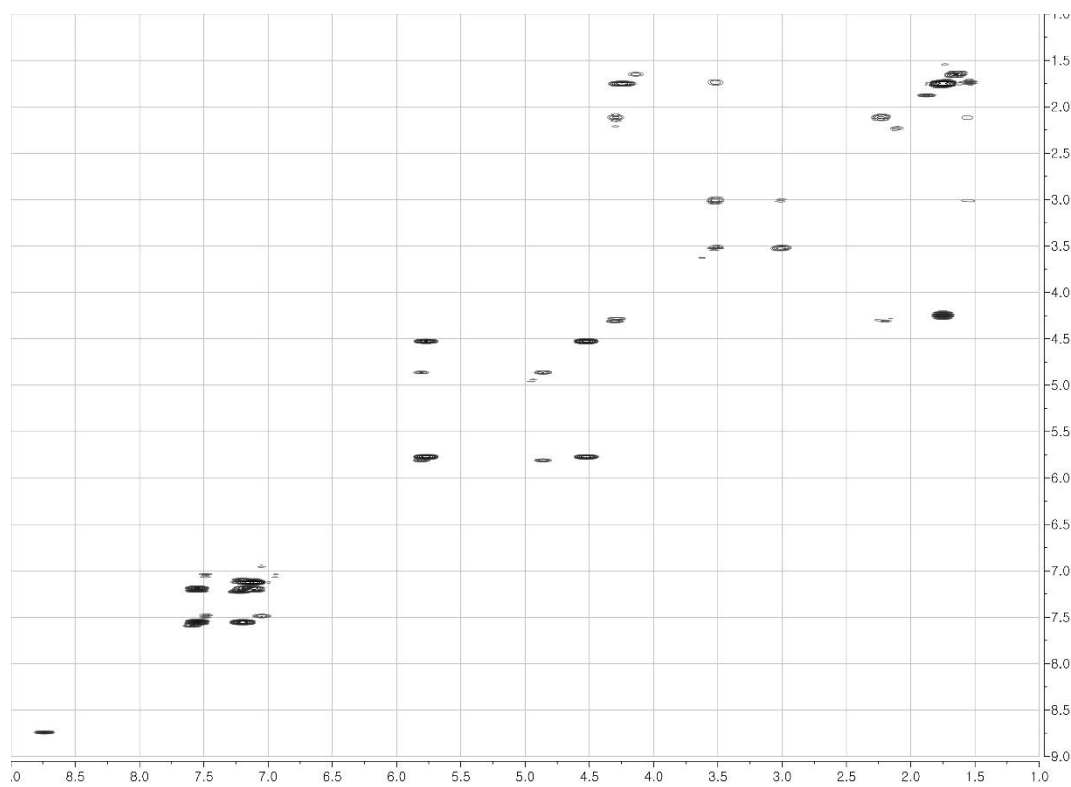

Figure S14. COSY NMR spectrum of compound **4**  
S18

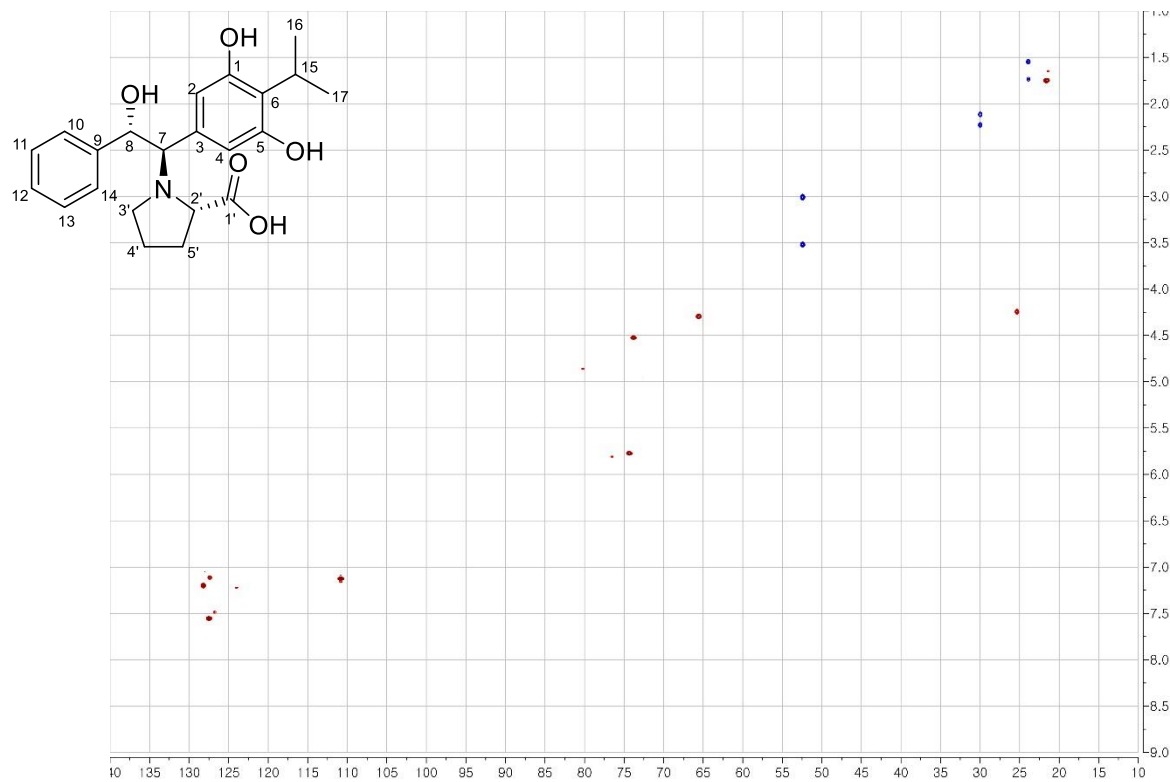

Figure S15. HSQC NMR spectrum of compound 4

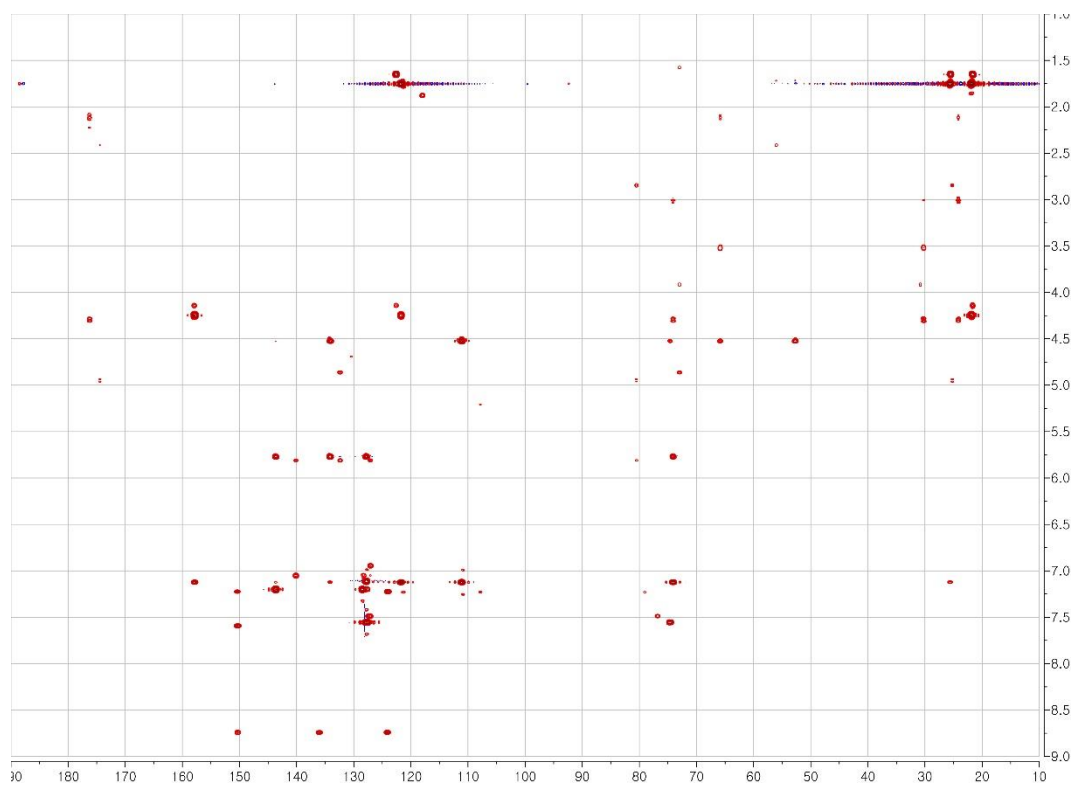

Figure S16. HMBC NMR spectrum of compound 4  
S19

Please select version of database to use:

DP4-original  
**DP4-database2**

Select probability distribution:

t distribution (recommended)  
 normal distribution

13C Calc:

C1,C2,C3,C4,C5,C6,C8,C11,C13,C14,C22,C23,C2  
 148.81,111.45,148.93,104.51,137.08,103.69,28.48  
 149.06,111.53,148.78,103.64,136.78,104.52,28.52

1H Calc:

H10,H12,H15,H16,H17,H18,H19,H20,H21,H29,H3  
 5.97,5.99,3.15,0.97,1.11,1.63,0.96,1.53,1.10,7.18,7  
 6.08,5.92,3.14,1.01,0.90,1.70,0.99,1.76,0.97,7.16,7

13C Expt:

157.55(C1),120.08(C2),157.55(C3),106.60(C4),14

1H Expt:

6.93(H10),6.93(H12),4.23(H15),1.74(H16),1.74(H1

Read Data Show Assignments Calculate Clear

This calculation will use the DP4-database2 version of the database and the t distribution.  
 (To change these options select the desired database and distribution from the menus at the top of the applet and then click Calculate).

Results of DP4 using both carbon and proton data:  
 Isomer 1: 95.1%  
 Isomer 2: 4.9%

Results of DP4 using the carbon data only:  
 Isomer 1: 47.4%  
 Isomer 2: 52.6%

Results of DP4 using the proton data only:  
 Isomer 1: 95.5%  
 Isomer 2: 4.5%

(c) Jonathan M Goodman and Steven G Smith

Figure S17. DP4 analysis of compound **3** with diastereomers A and B corresponding to isomers 1 and 2 in this figure

## Assignment of stereochemistry and structure using NMR and DP4

Please select version of database to use:

DP4-original  
**DP4-database2**

Select probability distribution:

t distribution (recommended)  
 normal distribution

**13C Calc:**

|                                                 |                                                     |
|-------------------------------------------------|-----------------------------------------------------|
| C1,C2,C3,C4,C5,C6,C8,C11,C13,C14,C22,C23,C2     | H10,H12,H15,H16,H17,H18,H19,H20,H21,H29,H3          |
| 149.53,113.04,148.41,106.66,135.89,107.12,28.55 | 6.20,5.85,3.30,0.96,1.16,1.57,0.97,1.61,1.09,7.10,7 |
| 148.29,113.04,148.85,108.71,134.16,107.87,28.54 | 5.77,6.20,3.24,0.97,1.35,1.32,0.96,1.81,0.92,7.12,7 |

**1H Calc:**

**13C Expt:** 157.57(C1),121.45(C2),157.57(C3),110.83(C4),13:

**1H Expt:** 7.12(H10),7.12(H12),4.25(H15),1.75(H16),1.75(H1

Read Data Show Assignments Calculate Clear

This calculation will use the DP4-database2 version of the database and the t distribution. (To change these options select the desired database and distribution from the menus at the top of the applet and then click Calculate).

Results of DP4 using both carbon and proton data:  
 Isomer 1: 100.0%  
 Isomer 2: 0.0%

Results of DP4 using the carbon data only:  
 Isomer 1: 99.3%  
 Isomer 2: 0.7%

Results of DP4 using the proton data only:  
 Isomer 1: 100.0%  
 Isomer 2: 0.0%

Figure S18. DP4 analysis of compound **4** with diastereomers A and B corresponding to isomers 1 and 2 in this figure

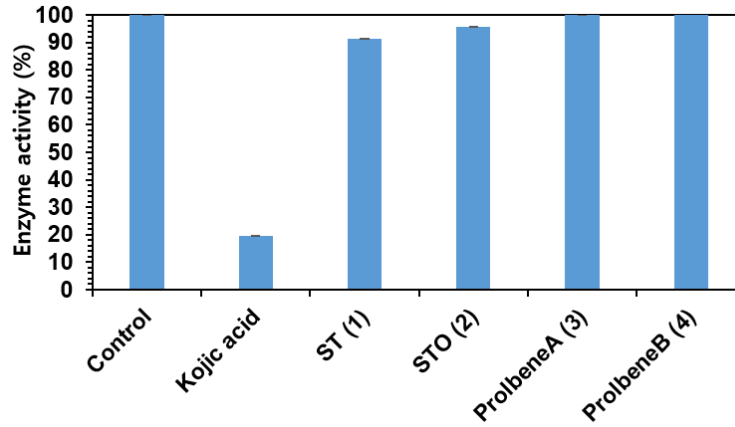

Figure S19. Mushroom tyrosinase inhibitory assay results of compounds **1-4**

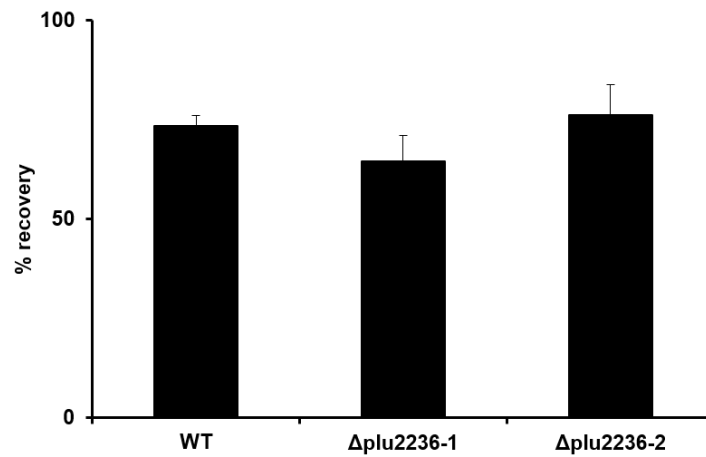

| Strain             | % Recovery | n | SEM  |
|--------------------|------------|---|------|
| WT                 | 73.3       | 5 | 2.69 |
| $\Delta plu2236-1$ | 64.5       | 5 | 6.32 |
| $\Delta plu2236-2$ | 76.0       | 5 | 7.73 |

Figure S20. IJs recovery (in %) on *P. luminescens* WT and  $\Delta plu2236$ .  $\Delta plu2236-1$  and -2 indicate two independent isolates from mutagenesis

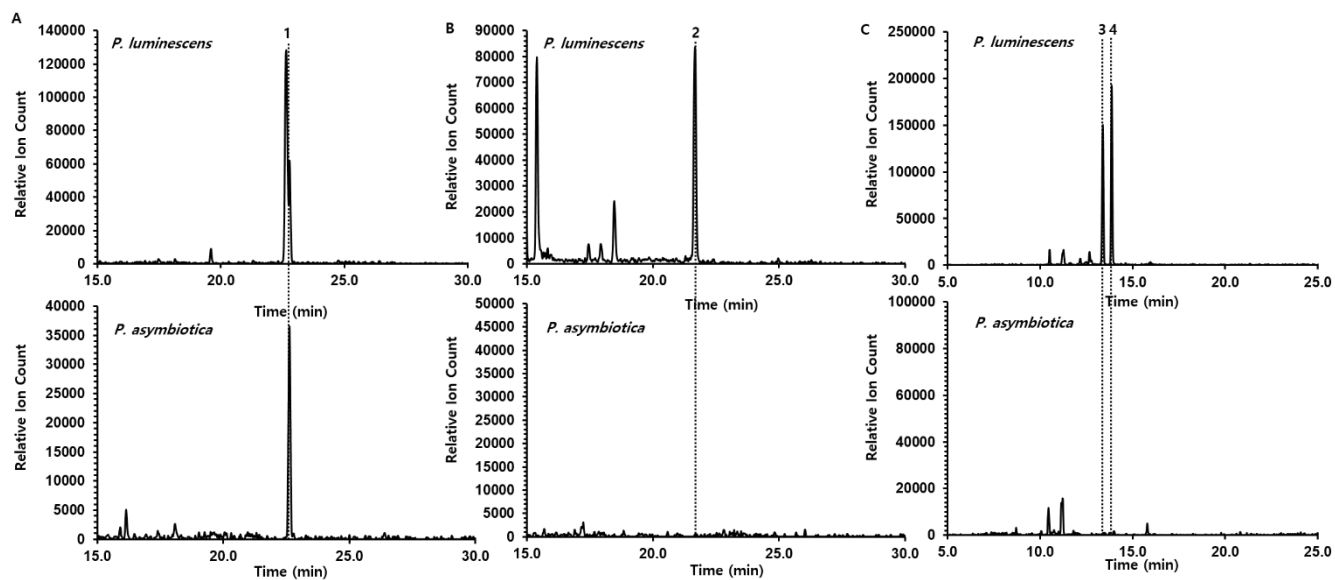

Figure S21. LC/MS comparisons for the production of stilbene **1**, stilbene epoxide **2**, and prolbene **3** and **4** from ethyl acetate extracts of *P. luminescens* (top) and *P. asymbiotica* (bottom) culture broth

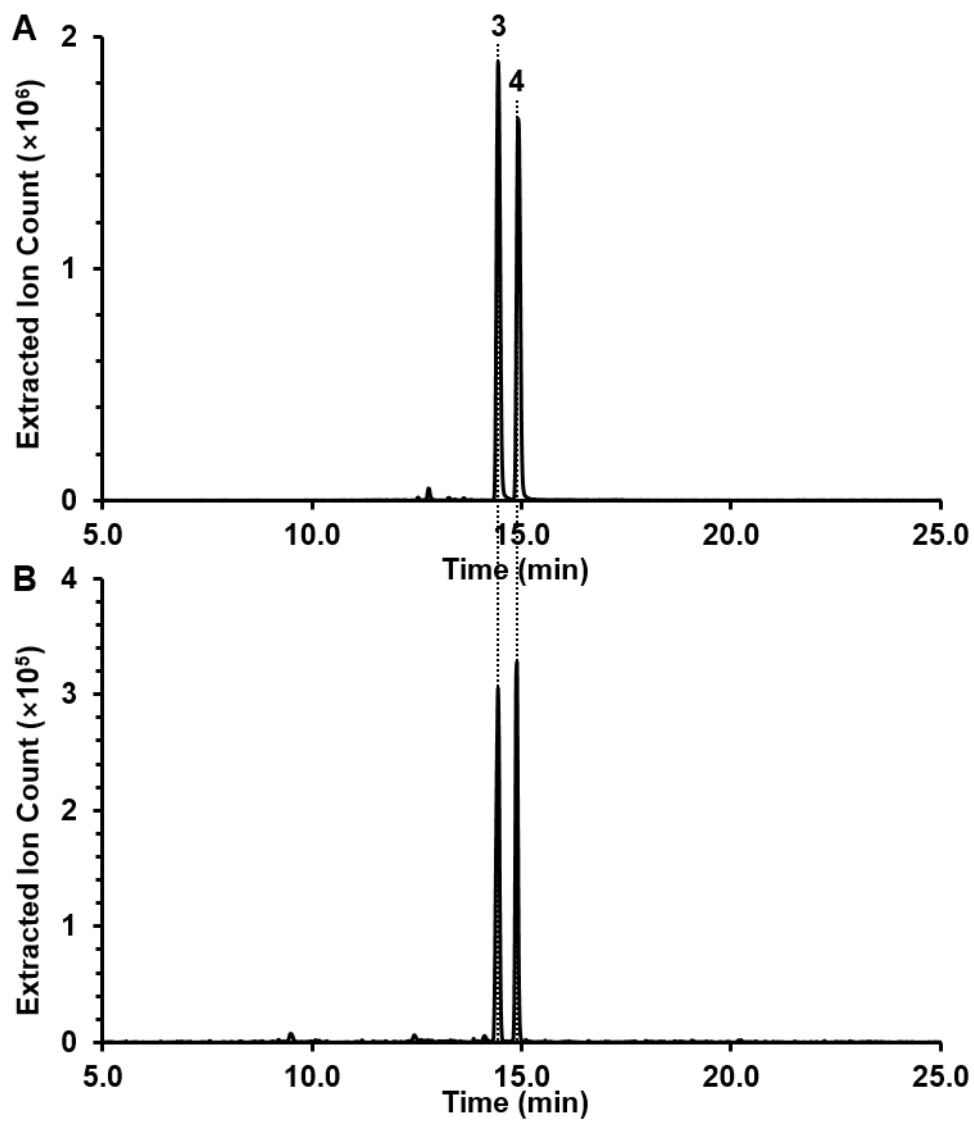

Figure S22. The production of prolbenes **3** and **4** from cell-free medium (B) supplemented with L-proline and stilbene epoxide **2**

#### Supplemental Reference

1. Robert, X., and Gouet, P. (2014) Deciphering key features in protein structures with the new ENDscript server. *Nucleic Acids Res.* **42(W1)**, W320-W324
